# Supplementary material for: Modulation of antibiotic resistance by the essential oil of Ocimum gratissimum L. in association with light-emitting diodes (LED) lights
Source: publisher site journal article supplement (doi:10.1515/znc-2020-0034), 2020-07-06
Supplement: Supplementary file 1 [file j_znc-2020-0034_suppl.docx]

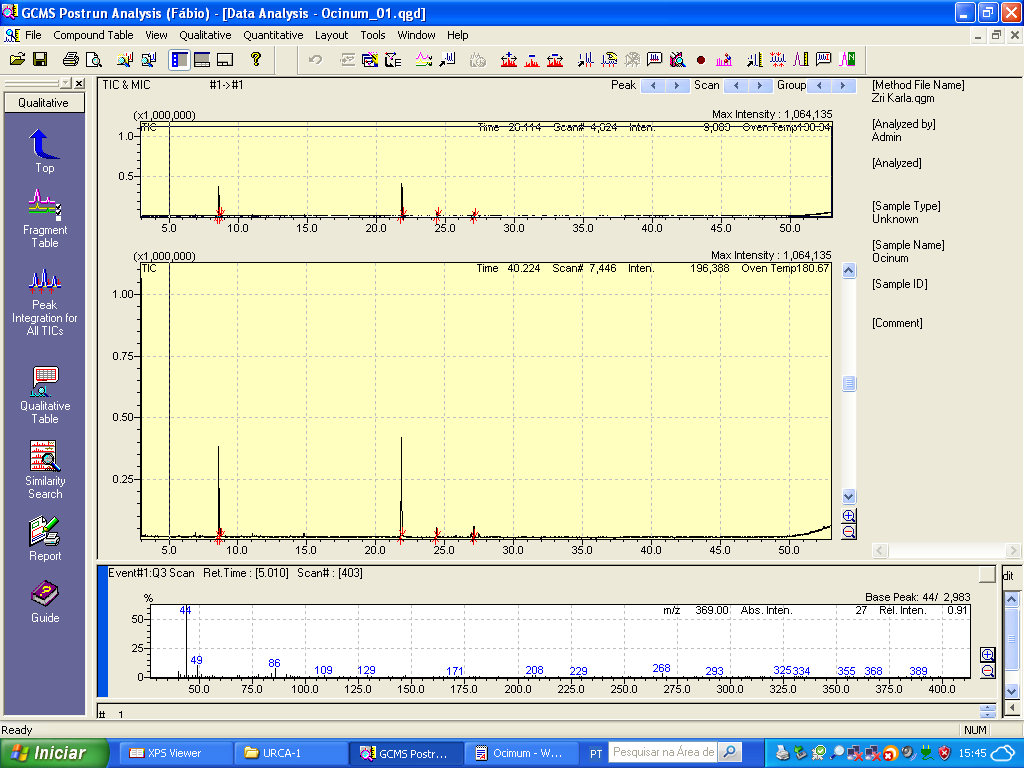


**Figure:** Analysis of the chemical constituents of the essential oil of *O. gratissimum* by Gas Chromatography System coupled to Mass Spectrometer (GC-MS)
